# Supplementary material for: Empagliflozin Induces White Adipocyte Browning and Modulates Mitochondrial Dynamics in KK Cg-Ay/J Mice and Mouse Adipocytes
Source: PubMed Central journal article supplement (PMC8578598; doi:10.3389/fphys.2021.745058), 2021-10-27
Supplement: Data_Sheet_1.pdf [file Data_Sheet_1.pdf]

## Supplementary Tables

**Supplementary Table 1. Primary antibodies used for Western blot analysis**

| Antibody       | Manufacturer                   | Dilution factor | Catalogue number |
|----------------|--------------------------------|-----------------|------------------|
| AMPK           | Abcam, USA                     | 1:1000          | ab207442         |
| p-AMPK         | Abcam, USA                     | 1:1000          | ab133448         |
| PGC-1 $\alpha$ | Proteintech, China             | 1:1000          | 20658-1-AP       |
| NRF2           | Abcam, USA                     | 1:1000          | ab76026          |
| UCP1           | Proteintech, China             | 1:500           | 23673-1-AP       |
| TFAM           | Abcam, USA                     | 1:500           | ab131607         |
| COX IV         | Proteintech, China             | 1:4000          | 11242-1-AP       |
| CYTO C         | Proteintech, China             | 1:2000          | 10993-1-AP       |
| DRP1           | Cell Signaling Technology, USA | 1:1000          | #8570            |
| p-DRP1         | Cell Signaling Technology, USA | 1:1000          | #3455            |
| MFN2           | Cell Signaling Technology, USA | 1:1000          | #9482            |
| Complex I      | Proteintech, China             | 1:1000          | 20312-1-AP       |
| Complex II     | Proteintech, China             | 1:1000          | 14865-1-AP       |
| Complex III    | Proteintech, China             | 1:1000          | 55090-1-AP       |
| SGLT2          | Abcam, USA                     | 1:1000          | ab37296          |
| GAPDH          | Bioworld, USA                  | 1:5000          | AP0063           |

AMPK, adenosine 5' monophosphate-activated protein kinase; PGC-1  $\alpha$ , peroxisome proliferator-activated receptor  $\gamma$ -coactivator factor-1; NRF2, nuclear factor erythroid 2-related factor 2; UCP1, uncoupling protein 1; TFAM, transcription factor A; COX IV, cytochrome C oxidase subunit IV; CYTO C, cytochrome C; DRP1, dynamin-related protein 1; MFN2, mitofusin-2; GAPDH, glyceraldehyde 3-phosphate dehydrogenase; SGLT2, Sodium-glucose co-transporter-2;

**Supplementary Table 2. Sequences of primers used for RT-qPCR**

| <b>Genes</b>   | <b>Forward (5'-3')</b>   | <b>Reverse (5'-3')</b>  |
|----------------|--------------------------|-------------------------|
| <i>Plin1</i>   | GTCCGTCGGCTGTCCACCC      | ATGCTGTTTCCTGGCGCTTCG   |
| <i>Adrb3</i>   | CAGGTTTGATGGCTATGAAGG    | GGGCAACCAGTCAAGAAGATG   |
| <i>Glut4</i>   | GGAGGGAGCCTTTGGTATTT     | CAGCACAGGACACTCATCTT    |
| <i>Fasn</i>    | TGTGGTGGGTTTGGTGAATTGT   | ACGAGGTCATGCTTTAGCACC   |
| <i>Pparg2</i>  | TCGCTGATGCACTGCCTATG     | GAGAGGTCCACAGAGCTGATT   |
| <i>Srebf1</i>  | CCTCTGATCTCATGGCTCATAAC  | CTAGGGAAGTGTGTGTGTTTCT  |
| <i>Pgc-1α</i>  | GACAATCCCGAAGACACTACAG   | AGAGAGGAGAGAGAGAGAGAGA  |
| <i>Ucp1</i>    | CTGCCAGGACAGTACCCAAG     | TCAGCTGTTCAAAGCACACAAA  |
| <i>Cox8b</i>   | GCGAAGTTCACAGTGGTTCC     | GGAACCATGAAGCCAACGACT   |
| <i>Dio2</i>    | GCTGCCGAATGTCAACGAATG    | CTGGTTCAGACTCACCTTGGA   |
| <i>Cytoc</i>   | GCTACCCATGGTCTCATCGTG    | CATCATCATTAGGGCCATCCT   |
| <i>Tfam</i>    | GTCCATAGGCACCGTATTGCG    | CCCATGCTGGAAAAACACTTCG  |
| <i>Mcp1</i>    | CCACTCACCTGCTGCTACTCAT   | TGGTGATCCTCTGTAGCTCTC   |
| <i>Tnf</i>     | GCCTCTTCTCATTCTGCTTGT    | GGCCATTTGGGAAGTCTCAT    |
| <i>F4/80</i>   | CGTCAGGTACGGGATGAATATAAG | ATCTTGGAAGTGGATGGCATAG  |
| <i>Ndufab1</i> | GGCTGCTGACTGGAAGTACT     | CTAGGCCAGATGTGTGGGAG    |
| <i>Ndufa8</i>  | GAGTTTATGCTGTGCCGCTG     | TACTCTGTGAAAGGCTCCGC    |
| <i>Cox7a1</i>  | AGTACACTTGAAAGGCGGGG     | GCCCAGCCCAAGCAGTATAA    |
| <i>Uqcrc2</i>  | TCCGACCCCATCTTGCTTTG     | CGGGGCAACTTTGAGGGAAT    |
| <i>Atp5a1</i>  | CATTTTGTGCCAGTCGTCCG     | CAGCTGTGCCAGTCTTCTGA    |
| <i>Idh3a</i>   | GAGTACGCTCGGAACAACCA     | AGTTCTCCGCAACTTCCCTG    |
| <i>Cs</i>      | TGTTTCAGGGGCCTTTAAGACT   | CATGCTTCAGTCCCAGTTCAT   |
| <i>Ogdh</i>    | CCTGGGGATTTTGGATGCTGAT   | GGCCATAGAACCCTCCTACTG   |
| <i>Gapdh</i>   | CATCACTGCCACCCAGAAGACTG  | ATGCCAGTGAGCTTCCCCTTCAG |

*Plin1*, perilipin1; *Adrb3*, beta3-adrenoceptor; *Glut4*, glucose transporter type 4; *Fasn*, fatty acid synthase; *Pparg2*, peroxisome proliferator-activated receptor 2; *Srebf1*, sterol regulatory element binding protein; *Pgc-1α*, peroxisome proliferator-activated receptor  $\gamma$  coactivator 1 $\alpha$ ; *Ucp1*, uncoupling protein 1; *Cox8b*, cytochrome c oxidase subunit 8B; *Dio2*, iodothyronine deiodinase 2; *Cytoc*, cytochrome c; *Tfam*, mitochondrial transcription factor A; *Mcp1*, monocyte chemotactic protein-1; *Tnf $\alpha$* , tumor necrosis factor  $\alpha$ ; *F4/80*, F4/80 antigen; *Ndufab1*, NADH:Ubiquinone oxidoreductase subunit AB1; *Ndufa8*, NADH:Ubiquinone oxidoreductase subunit A8; *Cox7a1*, cytochrome c oxidase polypeptide 7A1; *Uqcrc2*, cytochrome b-c1 complex subunit 2; *Atp5a1*, ATP synthase F1 subunit  $\alpha$ ; *Cs*, citrate synthase; *Ogdh*, oxoglutarate dehydrogenase; *Gapdh*, glyceraldehyde 3-phosphate dehydrogenase
